# Supplementary material for: Pseudomonas aeruginosa PA1006, Which Plays a Role in Molybdenum Homeostasis, Is Required for Nitrate Utilization, Biofilm Formation, and Virulence
Source: PubMed Central journal article supplement (PMC3568122; doi:10.1371/journal.pone.0055594), 2013-02-08
Supplement: pone.0055594.s001.pdf [file pone.0055594.s001.pdf]

## Supplemental File 1

**Table. PA1006 is not required for anaerobic growth with nitrite or arginine.**

|                          | Anaerobic                     |                               |                       |   | Aerobic <sup>d</sup> |                  |                    |
|--------------------------|-------------------------------|-------------------------------|-----------------------|---|----------------------|------------------|--------------------|
| Strain                   | KNO <sub>3</sub> <sup>a</sup> | KNO <sub>2</sub> <sup>b</sup> | Arginine <sup>c</sup> | - | KNO <sub>3</sub>     | KNO <sub>2</sub> | NH <sub>4</sub> Cl |
| PAO1                     | +                             | +                             | +                     | - | +                    | +                | +                  |
| ΔPA1006                  | -                             | +                             | +                     | - | -                    | -                | +                  |
| ΔPA1006<br>(attb:PA1006) | +                             | +                             | +                     | - | +                    | +                | +                  |

<sup>a</sup> Anaerobic growth on KNO<sub>3</sub> was determined by plating on LB plates containing 100 mM KNO<sub>3</sub> and incubating under anaerobic conditions for 48 hrs. The WT strain PAO1 grows on this media after 24 hrs.

<sup>b</sup> Anaerobic growth on KNO<sub>2</sub> was determined by plating strains on LB plates containing 10mM KNO<sub>2</sub> and incubating under anaerobic conditions for 72 hours. Growth of the WT strain PAO1 appears after 72 hours. (+), growth, (-), no growth.

<sup>c</sup> Anaerobic growth on arginine was determined by plating on LB plates containing 40mM L-Arginine and incubating under anaerobic conditions for 5 days. Growth of the WT strain PAO1 appears after 5 days. (+), growth, (-), no growth.

<sup>d</sup> Aerobic growth was determined by plating on VBMM plates containing either 100 mM KNO<sub>3</sub> , 10 mM KNO<sub>2</sub>, or NH<sub>4</sub>Cl, as the sole nitrogen source, and incubating under aerobic conditions for 48 hrs. (+), growth, (-), no growth.
