# Supplementary material for: Pseudomonas aeruginosa PA1006, Which Plays a Role in Molybdenum Homeostasis, Is Required for Nitrate Utilization, Biofilm Formation, and Virulence
Source: PubMed Central journal article supplement (PMC3568122; doi:10.1371/journal.pone.0055594), 2013-02-08
Supplement: pone.0055594.s002.pdf [file pone.0055594.s002.pdf]

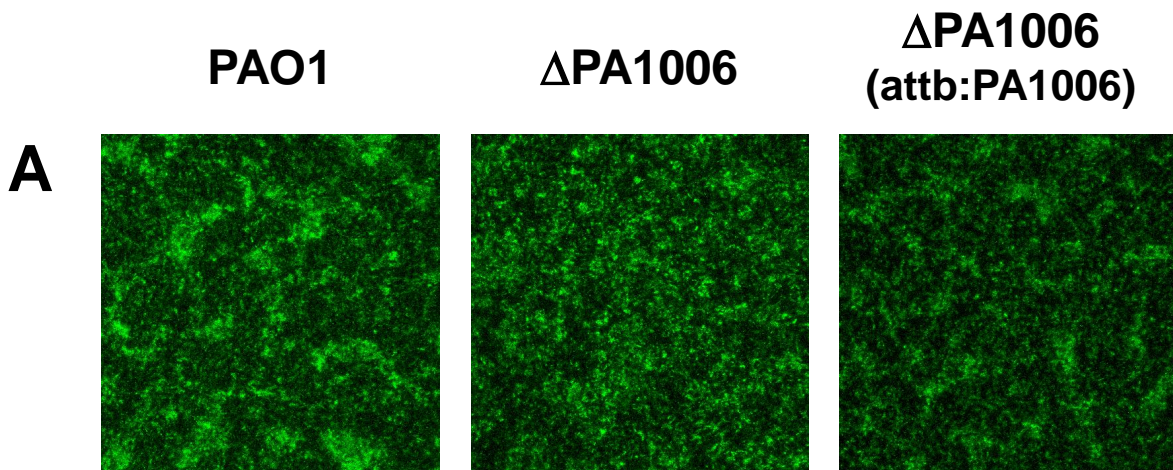

**B**

|                              | <b>Biomass</b><br>(mm <sup>3</sup> /mm <sup>2</sup> ) | <b>Average Thickness</b><br>(μm) |
|------------------------------|-------------------------------------------------------|----------------------------------|
| <b>PAO1</b>                  | 3.97 ± 0.43                                           | 9.31 ± 0.55                      |
| <b>ΔPA1006</b>               | 3.82 ± 1.30                                           | 9.41 ± 1.95                      |
| <b>ΔPA1006 (attb:PA1006)</b> | 4.43 ± 0.45                                           | 11.52 ± 0.96                     |
